# Supplementary material
Source: PubMed Central journal article supplement (PMC4409544)
Supplement: NIHMS670528-supplement-supplement_1.pdf [file NIHMS670528-supplement-supplement_1.pdf]

| Scaffold section         | Mean pore size $\pm$ SEM ( $\mu\text{m}$ ) |
|--------------------------|--------------------------------------------|
| CG bottom (longitudinal) | 143.1 $\pm$ 20.7                           |
| CG bottom (transverse)   | 160.9 $\pm$ 23.6                           |
| CG middle (longitudinal) | 221.0 $\pm$ 13.9*                          |
| CG middle (transverse)   | 215.7 $\pm$ 23.4                           |
| CGCaP top (longitudinal) | 189.1 $\pm$ 21.3                           |
| CGCaP top (transverse)   | 186.5 $\pm$ 9.1                            |

**Supplemental Table 1. Multi-compartment TBJ scaffold pore size.** Mean pore sizes in the longitudinal and transverse planes of the CG-CGCaP scaffold. \*: significantly greater than CG bottom (longitudinal) section.

| Transcript    | Sequence                                                                           | Reference |
|---------------|------------------------------------------------------------------------------------|-----------|
| <i>ALP</i>    | Forward: 5'-AGCACTCCCACCTTCATCTGGAA-3'<br>Reverse: 5'-GAGACCCAATAGGTAGTCCACATTG-3' | [12]      |
| <i>BSP</i>    | Forward: 5'-TGCCTTGAGCCTGCTTCC-3'<br>Reverse: 5'-GCAAAATTAAGCAGTCTTCATTTTG-3'      | [11]      |
| <i>COL1A1</i> | Forward: 5'-CAGCCGCTTCACCTACAGC-3'<br>Reverse: 5'-TTTTGTATTCAATCACTGTCTTGCC-3'     | [12]      |
| <i>GAPDH</i>  | Forward: 5'-AGAAAAACCTGCCAAATATGATGAC-3'<br>Reverse: 5'-TGGGTGTCGCTGTTGAAGTC-3'    | [12]      |
| <i>OCN</i>    | Forward: 5'-CAGCGAGGTAGTGAAGAGA-3'<br>Reverse: 5'-GAAAGCCGATGTGGTCAG-3'            | [12]      |
| <i>SCXB</i>   | Purchased from Qiagen (sequence unavailable)                                       | N/A       |
| <i>TNC</i>    | Forward: 5'-TTCAGTGGAGCTGACTGTGG-3'<br>Reverse: 5'-TAGGGCAGCTCATGTCACTG-3'         | [13]      |

**Supplemental Table 2. PCR primer sequences.**

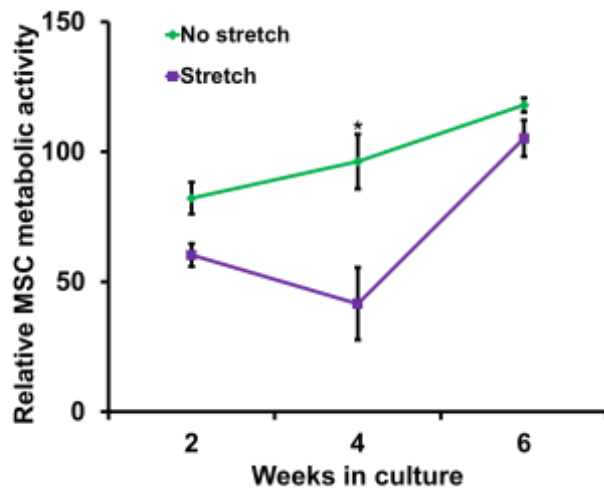

**Supplemental Figure 1. MSC long-term viability in TBJ scaffolds.** TBJ scaffolds maintained adequate and sustained MSC metabolic activity over the entire 6 week experiment. \*: significantly greater than stretch group.

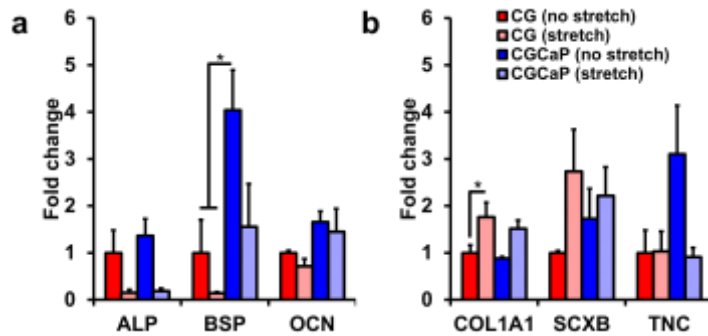

**Supplemental Figure 2. Complete MSC gene expression from 6 week culture. (a)** Expression of osteogenic genes alkaline phosphatase (*ALP*), bone sialoprotein (*BSP*), and osteocalcin (*OCN*) was elevated in the mineralized osseous compartment but generally decreased in response to stretch. **(b)** Expression of tenogenic markers type I collagen (*COL1A1*), scleraxis (*SCXB*), and tenascin-C (*TNC*) was elevated in the tendinous compartment in response to tensile stimulation with stretch also elevating tenogenic gene expression in the osseous compartment (with the exception of *TNC*).

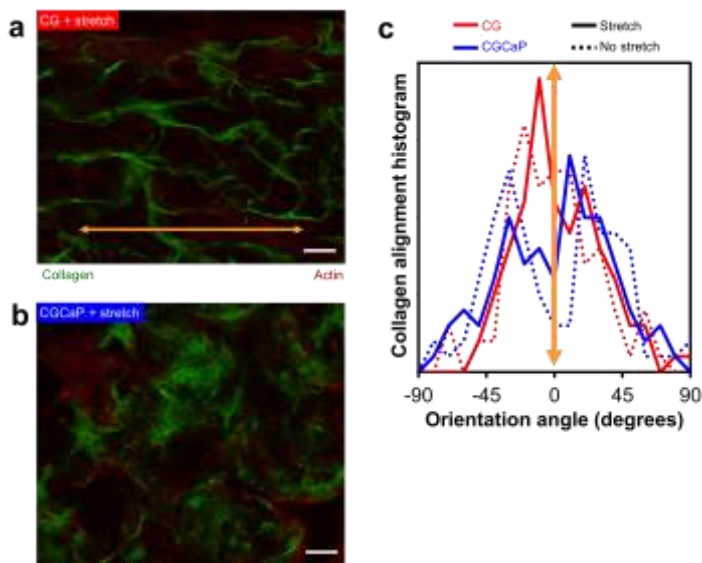

**Supplemental Figure 3. Second harmonic generation imaging of scaffold collagen organization.** Collagen organization in response to stretch in the (a) tendinous and (b) osseous compartments. *Green channel:* collagen. *Red channel:* actin. *Scale bars:* 50  $\mu\text{m}$ . (c) Quantification of collagen alignment in distinct compartments showed trend towards increased alignment and organization in the tendinous compartment.
